# Supplementary material
Source: PubMed Central journal article supplement (PMC4443856)
Supplement: NIHMS656715-supplement-Supplemental_Digital_Content.pdf [file NIHMS656715-supplement-Supplemental_Digital_Content.pdf]

## Appendix.

In addition to the authors, other members of the *Eunice Kennedy Shriver* National Institute of Child Health and Human Development Maternal-Fetal Medicine Units Network are as follows:

*Northwestern University, Chicago, IL* – G. Mallett, M. Ramos-Brinson, A. Roy, L. Stein, P. Campbell, C. Collins, N. Jackson, M. Dinsmoor (NorthShore University HealthSystem), J. Senka (NorthShore University HealthSystem), K. Paychek (NorthShore University HealthSystem), A. Peaceman

*Columbia University, New York, NY* – M. Talucci, M. Zylfijaj, Z. Reid (Drexel U.), R. Leed (Drexel U.), J. Benson (Christiana H.), S. Forester (Christiana H.), C. Kitto (Christiana H.), S. Davis (St. Peter's UH.), M. Falk (St. Peter's UH.), C. Perez (St. Peter's UH.)

*University of Utah Health Sciences Center, Salt Lake City, UT* – K. Hill, A. Sowles, J. Postma (LDS Hospital), S. Alexander (LDS Hospital), G. Andersen (LDS Hospital), V. Scott (McKay-Dee), V. Morby (McKay-Dee), K. Jolley (UVRMC), J. Miller (UVRMC), B. Berg (UVRMC)

*University of North Carolina at Chapel Hill, Chapel Hill, NC* – K. Dorman, J. Mitchell, E. Kaluta, K. Clark (WakeMed), K. Spicer (WakeMed), S. Timlin (Rex), K. Wilson (Rex)

*University of Texas Southwestern Medical Center, Dallas, TX* – L. Moseley, M. Santillan, J. Price, K. Buentipo, V. Bludau, T. Thomas, L. Fay, C. Melton, J. Kingsbery, R. Benezue

*University of Pittsburgh, Pittsburgh, PA* – H. Simhan, M. Bickus, D. Fischer, T. Kamon (deceased), D. DeAngelis

*Case Western Reserve University-MetroHealth Medical Center, Cleveland, OH* – B. Mercer, C. Milluzzi, W. Dalton, T. Dotson, P. McDonald, C. Brezine, A. McGrail

*The Ohio State University, Columbus, OH* – C. Latimer, L. Guzzo (St. Ann's), F. Johnson, L. Gerwig (St. Ann's), S. Fyffe, D. Loux (St. Ann's), S. Frantz, D. Cline, S. Wylie, J. Iams

*University of Alabama at Birmingham, Birmingham, AL* – M. Wallace, A. Northen, J. Grant, C. Colquitt, D. Rouse, W. Andrews

*University of Texas Medical Branch, Galveston, TX* – J. Moss, A. Salazar, A. Acosta, G. Hankins

*Wayne State University, Detroit, MI* – Y. Sorokin, N. Hauff, L. Palmer, P. Lockhart, D. Driscoll, L. Wynn, C. Sudz, D. Dengate, C. Girard, S. Field

*Brown University, Providence, RI* – P. Breault, F. Smith, N. Annunziata, D. Allard, J. Silva, M. Gamage, J. Hunt, J. Tillinghast, N. Corcoran, M. Jimenez

*The University of Texas Health Science Center at Houston-Children's Memorial Hermann Hospital, Houston, TX* – F. Ortiz, P. Givens, B. Rech, C. Moran, M. Hutchinson, Z. Spears, C. Carreno, B. Heaps, G. Zamora

Grobman WA, Bailit JL, Rice MM, Wapner RJ, Reddy WM, Varner MW, et al. Racial and ethnic disparities in maternal morbidity and obstetric care. *Obstet Gynecol* 2015;125.

The authors provided this information as a supplement to their article.

*Oregon Health & Science University, Portland, OR* – J. Seguin, M. Rincon, J. Snyder, C. Farrar, E. Lairson, C. Bonino, W. Smith (Kaiser Permanente), K. Beach (Kaiser Permanente), S. Van Dyke (Kaiser Permanente), S. Butcher (Kaiser Permanente)

*The George Washington University Biostatistics Center, Washington, D.C.* – E. Thom, Y. Zhao, P. McGee, V. Momirova, R. Palugod, B. Reamer, M. Larsen, T. Williams, K. Jablonski

*Eunice Kennedy Shriver National Institute of Child Health and Human Development, Bethesda, MD* – C. Spong, S. Tolivaisa

Grobman WA, Bailit JL, Rice MM, Wapner RJ, Reddy WM, Varner MW, et al. Racial and ethnic disparities in maternal morbidity and obstetric care. *Obstet Gynecol* 2015;125.

The authors provided this information as a supplement to their article.
